# Supplementary material for: Designing positive electrodes based on 3D hierarchical CoMn2O4@NiMn-LDH nanoarray composites for high energy and power density supercapacitors
Source: Royal Society of Chemistry journal article supplement (doi:10.1039/d0ce01131b), 2020-01-01
Supplement: d0ce01131b1.pdf [file d0ce01131b1.pdf]

*Supplementary Information for*

**Designing positive electrodes based on 3D hierarchical  
CoMn<sub>2</sub>O<sub>4</sub>@NiMn-LDH nanoarray composites for high energy  
and power density supercapacitors**

Suci Meng, Yintao Wang, Yuqi Zhang, Qing Xu, Deli Jiang and Min Chen\*

*School of Chemistry and Chemical Engineering, Jiangsu University, Zhenjiang*

*212013, China*

Corresponding author: Min Chen

E-mail address: *chenmin3226@sina.com*

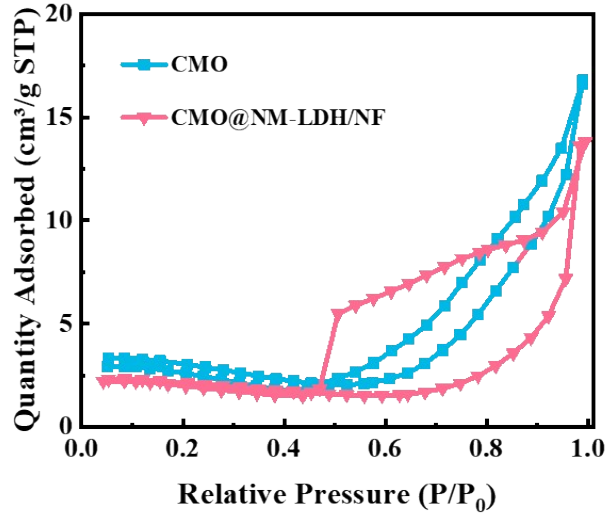

**Fig. S1** Nitrogen absorption-desorption isotherms of CMO and CMO@NM-LDH/NF.

The surface areas of CMO and CMO@NM-LDH/NF were analyzed through nitrogen absorption-desorption isotherm. As shown in Fig. S1, the observed hysteresis loops are classified as type III which indicates the irregular structure of pores. The BET specific surface area is calculated to be  $8.35 \text{ m}^2 \text{ g}^{-1}$  for CMO@NM-LDH/NF, while that of CMO is calculated to be  $6.02 \text{ m}^2 \text{ g}^{-1}$ .

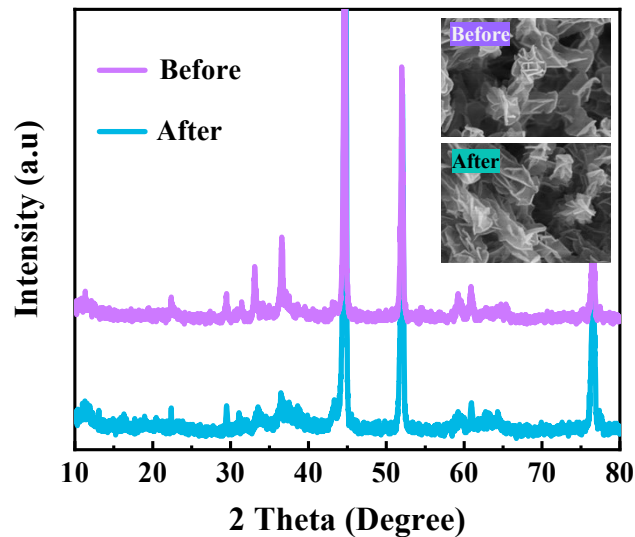

**Fig. S2** XRD patterns and SEM images of CMO@NM-LDH/NF before or after the cyclic stable measurement.

After the electrochemical cycling test of CMO@NM-LDH/NF, the XRD and SEM

analysis were carried out to study the changes of the sample structure. As displayed in Fig. S2, the XRD characteristic diffraction peaks of CMO and NM-LDH both can be observed for CMO@NM-LDH/NF after cycling. Otherwise, there expresses no obviously changes from SEM images. Therefore, the CMO@NM-LDH/NF materials are stable in the electrochemical charge-discharge procedure.
